# Supplementary material
Source: ML conference proceedings conference paper supplement (https://openreview.net/forum?id=Fr6bjeqRec)
Supplement: supplementary_material [file attachment]

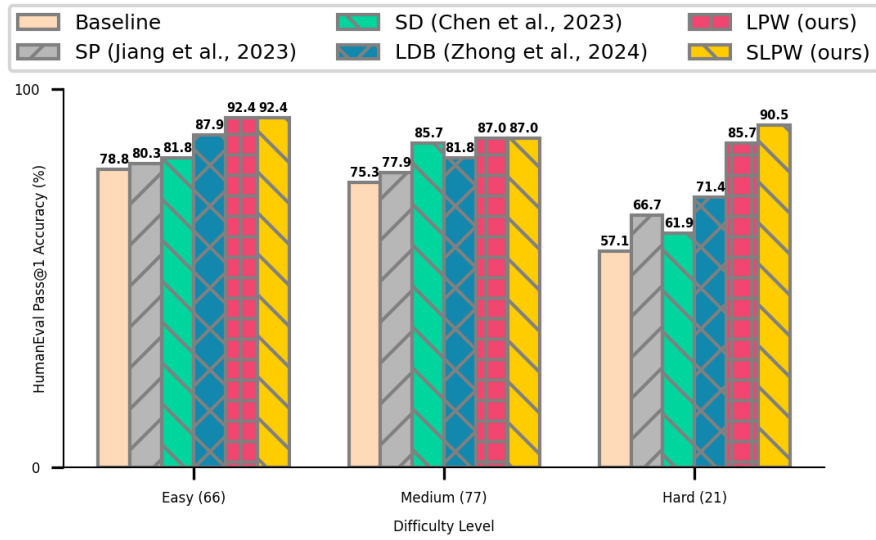

Figure 1: The Pass@1 accuracy across different difficulty levels, *Easy*, *Medium*, and *Hard* (part (b)) on the HumanEval benchmark when leveraging GPT-3.5 as the LLM backbone.
